# Supplementary material for: Using mobile technology in assessment of entrustable professional activities in undergraduate medical education
Source: Perspect Med Educ. 2020 Oct 23;10(6):373–7. doi: 10.1007/s40037-020-00618-9 (PMC8633342; doi:10.1007/s40037-020-00618-9)
Supplement: Supplementary file 4 — Tab. 4: Student and preceptor satisfaction with the eClinic Card Entrustable professional activities in core clerkship assessment, 2017–201 [file 40037_2020_618_MOESM4_ESM.docx]

**Table 4** Student and preceptor satisfaction with the eClinic Card *(T-Res 2 Clinic e-Card)*

| **Student satisfaction** | | | | | |
| --- | --- | --- | --- | --- | --- |
| **Item** | **Strongly disagree** | **Disagree** | **Neither agree nor disagree** | **Agree** | **Strongly agree** |
| I found it easy to access the T-Res 2 Clinic e-Card app. | 5.9% | 5.9% | 17.7% | 58.8% | 11.8% |
| I found it easy to use the T-Res 2 Clinic e-Card app. | 11.8% | 11.8% | 29.4% | 41.2% | 5.9% |
| The T-Res 2 Clinic e-Card app was dependable to use (e.g., limited technical issues). | 17.7% | 17.7% | 17.7% | 47.1% | 0.0% |
| I found it easy to listen and report the conversation with the preceptor accurately. | 52.9% | 23.5% | 11.8% | 11.8% | 0.0% |
| The clinic card process helped to facilitate appropriate coaching feedback between the preceptor and me. | 47.1% | 41.2% | 5.9% | 5.8% | 0.0% |
| The preceptors responded to the clinic card in a timely fashion. | 58.8% | 29.4% | 0.0% | 11.8% | 0.0% |
| The clinic card coaching process helped me identify areas of strength and areas for further growth in my clinical practice. | 23.5% | 35.3% | 23.5% | 17.7% | 0.0% |
| The coaching feedback and narrative comments I recorded were helpful to my learning. | 11.8% | 41.2% | 35.3% | 11.8% | 0.0% |
| Overall, the clinic card coaching process contributed to a positive phase 4 learning experience. | 41.2% | 11.8% | 41.2% | 5.9% | 0.0% |
| *n*=17 | | | | | |

| **Preceptor satisfaction** |
| --- |
| | **Item** | **Strongly disagree** | **Disagree** | **Neither agree nor disagree** | **Agree** | **Strongly agree** | | --- | --- | --- | --- | --- | --- | | There was adequate faculty development for the implementation and use of entrustable professional activities in assessment in phase 4 clerkship. | 7.4% | 23.5% | 45.7% | 18.5% | 4.9% | | There was adequate faculty development for the use of the clinic card process. | 7.4% | 25.9% | 43.2% | 18.5% | 4.9% | | I found it easy to use the T-Res 2 Clinic e-Card app/website. | 2.5% | 11.1% | 22.2% | 44.4% | 19.8% | | The T-Res 2 Clinic e-Card app/website was dependable to use (e.g., limited technical issues). | 1.2% | 7.4% | 11.1% | 61.7% | 18.5% | | The clinic card process helped to facilitate the conversation and coaching feedback between the student and myself. | 6.2% | 18.5% | 25.9% | 38.3% | 11.1% | | I received notification of clinic e-cards to review in a timely fashion. | 2.5% | 4.9% | 13.6% | 54.3% | 24.7% | | I found it easy to review and confirm the information as recorded by the student. | 3.7% | 11.1% | 18.5% | 44.4% | 22.2% | | I found it easy to add notes to the e-card before returning it to the student to modify. | 5.0% | 12.5% | 20.0% | 45.0% | 17.5% | | Overall, the clinic card coaching process contributed to a positive phase 4 preceptor experience. | 4.9% | 13.6% | 35.8% | 34.6% | 11.1% | | *n*=81 | | | | | | |
